# Supplementary material
Source: publisher figshare collection journal article supplement (https://gsapubs.figshare.com/ndownloader/files/22411437)
Supplement: Supplementary file 1 [file 22411437]

Archive with 4 entries (4 files):
- GES01455_SuppMat/Figure S1.pdf
- GES01455_SuppMat/Figure S2.pdf
- GES01455_SuppMat/Fornash et al. Supplementary Table 1 revised.xlsx
- GES01455_SuppMat/Fornash_etal_SupplementaryTable2.xlsx
