# Supplementary material
Source: publisher figshare collection journal article supplement (https://gsapubs.figshare.com/ndownloader/files/22411437)
Supplement: Supplementary file 1 [file 22411437 › GES01455_SuppMat/Figure S1.pdf]

[Phase information]  
 Name=Lawsonite  
 Source=[Lawsonite.cry]  
 Database=law  
 SpaceGroup=63, C m c m  
 LaueGroup=3, mmm  
 UnitCellLengths=5.85, 8.79, 13.13 Å  
 UnitCellAngles=90.0, 90.0, 90.0 °  
 UnitCellVolume=674.72 Å<sup>3</sup>  
 PhaseFamily=1 - best in family

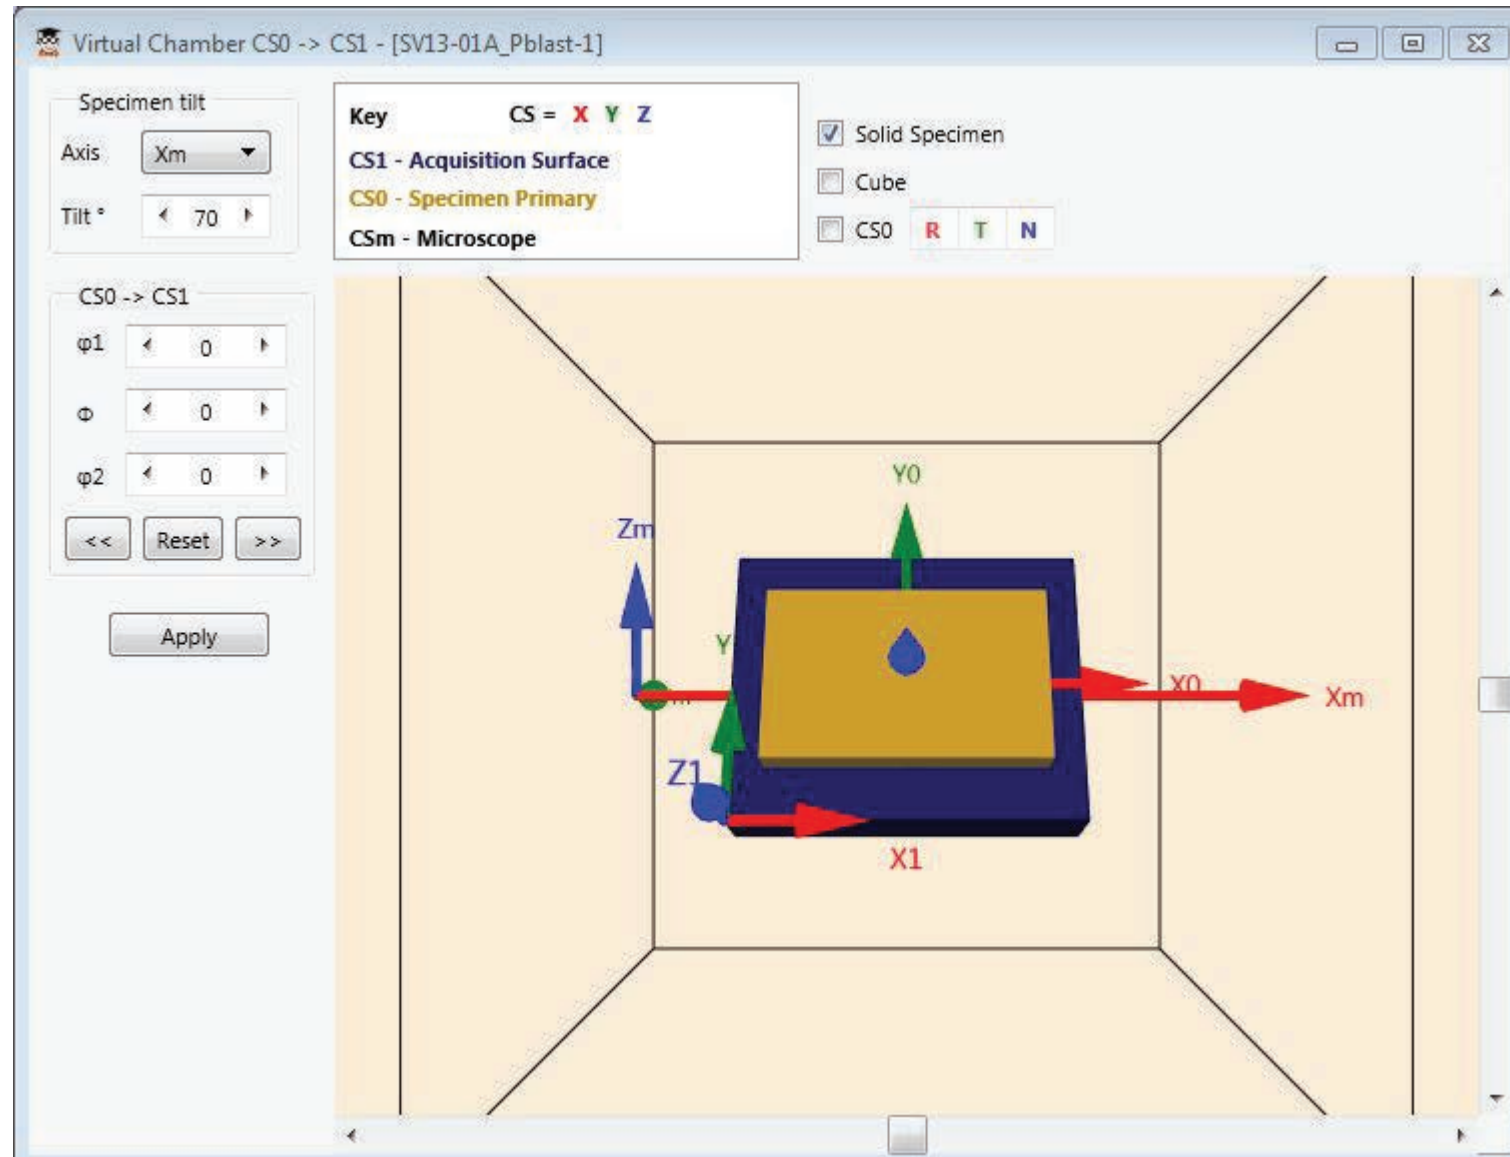

Supplementary Figure S1, Fornash et al.
