# Supplementary material
Source: publisher figshare collection journal article supplement (https://gsapubs.figshare.com/ndownloader/files/22411437)
Supplement: Supplementary file 1 [file 22411437 › GES01455_SuppMat/Fornash et al. Supplementary Table 1 revised.xlsx]

## Sheet: Table S1. Sample Coordinates
TABLE S1. SAMPLE LOCATIONS AND SUMMARY OF METHODS USED
		UTM Coordinates*				Methods
		Easting	Northing		Element Map	Major Elements	Trace Elements	EBSD Map	Bulk Rock Analysis
		(m)	(m)		(EMP)	(EMP)	(LA-ICPMS)
Metamafic samples
SV12-13E (core)		351574	4384265		X	X	X	X	X
SV03-103A (margin)		351574	4384265		X	X	X	X
SV03-103B (margin)		351574	4384265		X	X	X
SV03-305 (margin)		351574	4384265		X			X
SV08-4A		350046	4385062			X	X
SV12-24		344581	4386678		X	X	X	X
SV08-76		347773	4381019		X			X
SV12-59		344596	4386992		X		X		X
SV13-15		350572	4385194		X		X		X
SV13-06		350615	4385109		X		X
SV13-07		350711	4384917		X
SV13-01		350295	4384946		X	X	X	X
Metasedimentary samples
SV08-281D		350194	4385116			X	X
SV10-06		350066	4385206				X
SV10-03B		349975	4384913		X
SV13-12		350674	4384682						X
Lawsonite + chlorite rocks
TZ10-2.2c†		741000	4400780		X	X	X
SV13-17A		349839	4384940		X	X	X	X
SV12-21D		350042	4384924		X	X	X	X
Lawsonite-rich layers and veins
SV03-103C		351574	4384265		X	X	X	X
SV12-24B		344581	4386678						X
*Coordinates are reported using the European Datum 1950 (Universal Transverse Mercator, UTM) reference system, zone 36
†Coordinates reported are from Okay and Whitney (2010)
