# Supplementary material
Source: publisher figshare collection journal article supplement (https://gsapubs.figshare.com/ndownloader/files/22411437)
Supplement: Supplementary file 1 [file 22411437 › GES01455_SuppMat/Fornash_etal_SupplementaryTable2.xlsx]

## Sheet: Metamafic (Majors)
REPRESENTATIVE MAJOR ELEMENT COMPOSITIONS OF LAWSONITE IN METAMAFIC ROCKS
Lithology		Lawsonite eclogite (core)			Lawsonite eclogite (margin)			Retrogressed lawsonite eclogite				Chlorite + Epidote Pod			Blueschist
Sample #		SV12-13E	SV12-13E		SV03-103	SV03-103		SV08-4A	SV08-4A	SV08-4A		SV12-24	SV12-24		SV13-01	SV13-01	SV13-01	SV13-01
Textural Position		Ti-rich	Ti-poor		Ti-rich	Ti-poor		grt inclusion	core	rim		Ti-rich	Ti-poor		Cr-rich	Cr-rich	Ti-rich sector	Ti-poor sector
SiO2		37.94	38.29		38.44	38.42		38.59	38.96	38.39		38.17	38.55		37.41	37.67	38.15	38.28
TiO2		0.31	0.07		0.26	0.04		0.02	0.2	0.36		0.73	0.03		0.8	0.45	0.75	0.02
Al2O3		31.21	31.99		31.96	31.97		31.72	32.06	31.93		30.4	31.88		25.79	26.53	30.37	31.09
Cr2O3		0.02	0.01		0.01	0.01		0.04	0.06	0.06		bdl	0.02		5.81	4.91	0.74	1.12
FeO*		1.45	1.47		1.08	1.31		1.2	1.29	1.28		2.54	2.01		2.12	2.04	1.86	1.38
MnO		bdl	bdl		bdl	bdl		0.04	bdl	bdl		bdl	bdl		0.01	0.02	bdl	bdl
MgO		bdl	bdl		bdl	bdl		0.03	bdl	bdl		0.04	bdl		0.01	0.03	0.02	0.02
CaO		17.92	17.86		17.95	17.75		17.75	17.95	17.92		17.75	17.8		17.26	16.78	17.56	17.59
Na2O		bdl	bdl		bdl	bdl		bdl	bdl	bdl		bdl	bdl		bdl	0.03	bdl	0.03
K2O		bdl	bdl		bdl	bdl		bdl	bdl	bdl		bdl	bdl		bdl	bdl	0.02	bdl
Total (Wt.%)		88.85	89.69		89.7	89.5		89.39	90.52	89.94		89.63	90.29		89.21	88.46	89.47	89.53
Cations calculated on 8 oxygen basis
Si		2	1.99		2	2		2.01	2.01	1.99		2	2		2.01	2.03	2	2
Ti		0.01	0		0.01	0		0	0.01	0.01		0.03	0		0.03	0.02	0.03	0
Al		1.94	1.96		1.96	1.96		1.95	1.95	1.95		1.88	1.95		1.634	1.68	1.88	1.92
Fe3+		0.06	0.06		0.05	0.06		0.05	0.06	0.06		0.11	0.09		0.1	0.09	0.08	0.06
Cr		0	0		0	0		0	0	0		0	0		0.25	0.21	0.03	0.05
Mn		0	0		0	0		0	0	0		0	0		0	0	0	0
Mg		0	0		0	0		0	0	0		0	0		0	0	0	0
Ca		1.01	1		1	0.99		0.99	0.99	1		1	0.99		1	0.97	0.99	0.99
Na		0	0		0	0		0	0	0		0	0		0	0	0	0
K		0	0		0	0		0	0	0		0	0		0	0	0	0
Total (cations)		5.02	5.01		5.02	5.01		5	5.02	5.01		5.03	5.03		5.024	5	5.01	5.02
Note: bdl = below detection level.

## Sheet: Metamafics I (Trace)
REPRESENTATIVE TRACE ELEMENT COMPOSITIONS OF LAWSONITE IN METAMAFIC ROCKS
Lithology		Lawsonite eclogite (fresh, pod core)					Lawsonite eclogite (fresh, pod margin)					Lawsonite eclogite (retrogressed)				Chlorite + epidote pod
Sample #		SV12-13E	SV12-13E	SV12-13E	SV12-13E		SV03-103A	SV03-103A	SV03-103A	SV03-103A		SV08-4A	SV08-4A	SV08-4a		SV12-24	SV12-24	SV12-24	SV12-24
Textural Position		high Ti	high Ti	low Ti	low Ti		high Ti	high Ti	low Ti	low Ti		grt inclusion	core	rim		high Ti	low Ti	high Ti	low Ti
(ppm)
P		25	21.7	18.2	23.2		17	21	28	22		17	41	24		29.4	24.5	25.3	71
Sc		2.38	3.59	2.55	3.18		4.22	3.14	2.41	2.43		2	1.14	1.75		4.64	4.13	5.14	4.03
Ti		1437	976	455	375		4230	2222	364	374		468	322	1197		2338	236.6	1740	765
V		262.2	231.8	429.3	268.9		305.9	239.4	250.7	247.1		559	725	668		213.7	227	229.1	188.7
Cr		305.2	255.6	317.2	404.8		96.7	245.4	91.9	41.1		24.7	249.5	680		112.7	163.2	203	152.9
Mn		12.77	14.15	17.2	16.75		23.9	20.8	18.5	22.5		480	18.4	26.4		45.9	31.19	35.8	57.19
Sr		1326	1211	1567	1358		533	443.9	669	1096		418.7	484	633		534	772	626	657
Y		18.84	27.1	8.41	56		32.7	23.5	20.51	26.1		94.4	87	10.42		5.75	11.69	24.6	133.4
Zr		bdl	0.012	bdl	bdl		0.026	bdl	0.18	0.2		0.078	bdl	bdl		bdl	bdl	bdl	bdl
Nb		0.035	0.0053	bdl	0.0015		0.78	bdl	bdl	bdl		0.021	bdl	bdl		bdl	bdl	0.43	0.309
Cs		bdl	0.041	bdl	bdl		bdl	bdl	bdl	bdl		bdl	bdl	bdl		bdl	bdl	bdl	bdl
Ba		bdl	0.077	0.23	0.65		0.5	0.09	0.1	0.04		0.87	bdl	bdl		0.82	bdl	0.77	1.45
La		0.956	6.77	0.98	10.13		5.13	2.88	3.52	11.1		148.2	133.9	4.5		2.21	3.59	43.1	185.2
Ce		2.86	16.51	2.29	25.12		11.72	7.59	8.62	28.3		348	327	12.91		4.37	7.98	75.2	324.7
Pr		0.426	2.07	0.241	3.65		1.5	1.09	1.15	3.85		43.1	45.2	2.17		0.586	0.969	8.1	33.9
Nd		1.75	8.34	1.05	18.17		7.67	5.4	6.02	19.7		202	217.4	11.9		2.36	4.62	27.6	127.3
Sm		0.54	1.76	0.21	6.3		2.14	1.07	1.46	5.94		40	46.1	2.68		0.49	1.08	5.1	24.86
Eu		0.18	0.375	0.068	1.94		0.55	0.389	0.351	1.49		10.2	12.73	0.84		0.189	0.398	1.66	8.47
Gd		0.92	1.67	0.36	9.01		2.59	2.09	2.32	6.67		37.9	41.7	2.79		0.61	1.47	4.16	22.42
Tb		0.244	0.386	0.069	1.8		0.544	0.33	0.534	0.96		4.39	3.9	0.54		0.107	0.202	0.696	3.46
Dy		2.55	3.74	0.73	12.18		4.22	3.25	2.95	4.97		23.6	21.4	2.17		0.67	1.89	4.3	23
Ho		0.557	0.91	0.221	1.98		0.95	0.74	0.64	1.07		3.14	3.23	0.34		0.168	0.455	0.95	4.55
Er		0.97	1.89	0.71	3.33		2.98	2.36	2.19	2.06		7.1	6.27	0.79		0.61	1.18	2.26	13.08
Tm		0.055	0.155	0.077	0.225		0.348	0.213	0.166	0.183		0.48	0.48	bdl		0.111	0.153	0.334	1.664
Yb		0.166	0.39	0.42	0.45		2.03	1.6	1.16	0.4		1.86	1.9	0.38		0.53	1.1	1.74	10.16
Lu		0.005	0.033	0.044	0.036		0.233	0.217	0.19	0.047		0.173	0.194	bdl		0.082	0.192	0.397	1.5
Hf		bdl	bdl	bdl	bdl		bdl	bdl	bdl	bdl		bdl	bdl	bdl		bdl	bdl	bdl	bdl
Ta		0.0015	bdl	bdl	bdl		0.144	bdl	bdl	bdl		bdl	bdl	bdl		bdl	bdl	bdl	bdl
Pb		34.89	35.7	35.7	37.28		11.76	10	14.11	27.41		9.94	12.62	28.5		68.9	94.2	70.2	86.6
Th		0.046	1.6	0.0087	0.052		0.152	0.174	0.113	0.84		7.87	52	0.53		0.304	0.208	1.64	7.05
U		0.0056	0.239	0.0067	0.076		0.097	0.0036	0.025	0.077		6.07	3.2	bdl		bdl	bdl	bdl	3.4
Note: bdl = below detection level.

## Sheet: Metamafics II (Trace)
REPRESENTATIVE TRACE ELEMENT COMPOSITIONS OF LAWSONITE IN METAMAFIC ROCKS (BLUESCHIST-FACIES)
Lithology		Lawsonite blueschist					Lawsonite garnet blueschist					Lawsonite garnet blueschist (İkipinar)				Blueschist
Sample #		SV13-15	SV13-15	SV13-15	SV13-15		SV13-06B	SV13-06B	SV13-06B	SV13-06B		SV12-59	SV12-59	SV12-59		SV13-01	SV13-01	SV13-01	SV13-01
Textural Position		matrix	matrix	lws+ph layer	lws+ph layer		matrix	matrix	matrix	matrix		ph+lws cluster	matrix	matrix
		core	rim	core	rim		core	core	rim	rim			Ti-poor	Ti-rich		Cr-rich	Cr-rich	Ti-rich sector	Ti-poor sector
(ppm)
P		18.9	19.4	26.7	23.7		20.3	22.5	24	25.6		15.5	24.8	22.6		26	42	44	33
Sc		5.65	3.82	2.94	3.09		3.67	5.13	3.22	3.57		4.24	4.06	5.05		8.24	4.23	16.3	3.41
Ti		1370	1546	12	8.7		682	395	664	737		493	424	1118		479	1337	2410	283
V		665	504.7	492	564		391.8	413.9	423.5	421		541	546.1	499.2		498.3	606.6	383.4	416.7
Cr		7	37.2	9.4	9		783	532	852	633		31.7	140.3	189.8				2993	1865
Mn		69.2	62.5	33.4	36.41		18.4	18.07	12.57	25.2		42.3	53.2	45.4		29.7	36.3	522	33.7
Sr		624	410	862	1225		828	810	731	741		475.1	505	392.5		849	753	229.9	225
Y		100	9.44	26.4	18.58		13.93	22.42	57	48.2		15.93	18.07	14.81		51.6	139	21.6	19.9
Zr		0.011	0.018	0.038	0.001		bdl	0	0	bdl		bdl	0.071	0.038		0.048	0.03	0.59	0.016
Nb		0.012	0.113	0.041	0.021		0.38	0.008	0.0017	0		bdl	bdl	bdl		0.02	0.069	0.48	0.048
Cs		0	0.037	0.013	0		0.041	0.024	0	0.005		0.174	0.035	0.035		bdl	bdl	bdl	0.2
Ba		0.095	0.032	0.97	0.59		0.69	0.23	0.044	0.32		13.2	1.83	0.46		0.74	1.03	0.74	0.44
La		381	59.8	35.2	29.87		14.73	32.6	15.14	14.79		6.62	10.06	6.81		52	73.1	32.9	3.24
Ce		615	118.5	73	63.7		38.1	75.5	40.4	41.9		18.26	28.9	19.73		104.1	155.2	68.5	9.67
Pr		57.3	11.75	8.68	7.4		4.98	9.27	5.61	5.68		2.66	4.25	2.93		10.85	18.33	7.75	1.23
Nd		197	38.7	8.68	7.4		24.2	42	27.8	28.7		14.17	22.2	15.14		41.6	74.3	32.9	6.6
Sm		31	5.52	7.23	6.75		5.69	9.63	9.2	8.55		3.81	5.6	4.14		7.99	17.3	5.8	1.99
Eu		14.3	1.56	2.46	1.94		1.68	3.12	3.21	2.63		1.17	1.63	1.27		2.77	5.82	1.53	0.66
Gd		23.2	2.93	6.56	5.98		5.53	9.52	12.51	9.5		4.26	6.21	4.03		6.44	16.8	5.2	3.35
Tb		2.85	0.358	0.81	0.758		0.688	1.186	2.33	1.53		0.594	0.707	0.542		1.19	3.08	0.65	0.372
Dy		17.6	2.14	5.38	3.73		2.8	5.49	15.45	10.8		3.47	4.25	2.93		8.65	25	4	3.1
Ho		3.14	0.417	0.865	0.651		0.522	0.944	2.314	1.77		0.57	0.686	0.52		1.97	4.98	0.83	0.67
Er		9.3	0.78	2.61	1.34		1.23	1.56	3.3	4.45		1.23	1.56	1.36		5.7	14.72	1.54	2.09
Tm		1.03	0.095	0.061	0.031		0.137	0.159	0.185	0.424		0.119	0.2	0.127		0.878	1.94	0.32	0.256
Yb		5.97	0.56	1.94	0.89		0.57	0.46	0.33	1.38		0.42	0.75	1.14		5.27	11.44	1.31	2
Lu		0.75	0.056	0.307	0.125		0.105	0.043	0.022	0.101		0.038	0.087	0.179		0.524	1.26	0.178	0.256
Hf		0	0	0	0		0	0	0	0		bdl	bdl	bdl		bdl	bdl	bdl	bdl
Ta		bdl	0	0	0		0.016	0	0	0		bdl	0	0		bdl	0.0024	0.073	bdl
Pb		28.68	18.71	28.53	31.2		25.28	28.79	25.28	23.2		2.67	2.76	1.97		35.47	34.93	16.5	9.83
Th		1.28	0.272	0.083	0.051		0.36	2.62	0.381	1.34		bdl	0.088	0.042		0.848	2.31	5.64	1.33
U		2.9	0.03	0.47	0.205		0.191	2.6	0.096	0.14		0.0064	bdl	0.021		0.247	0.92	0.73	0.223
Note: bdl = below detection limit

## Sheet: Metasediments (Majors)
REPRESENTATIVE MAJOR ELEMENT COMPOSITIONS OF LAWSONITE IN METASEDIMENTS
Lithology		Quartz-rich schist				Quartzite (blueschist-facies)
Sample #		SV08-281C	SV08-281C	SV08-281C		SV10-03B	SV10-03B	SV10-03B
Textural Position		core		rim		core		rim
SiO2		37.762	37.26	37.26		37.85	37.95	37.69
TiO2		0.06	0.06	0.1		0.09	0.09	0.07
Al2O3		31.03	30.83	30.03		31.4	31.43	30.98
Cr2O3		0.02	0.03	bdl		bdl	bdl	bdl
FeO*		1.71	1.86	1.79		1.89	1.91	1.89
MnO		0.01	0.05	0.04		bdl	bdl	bdl
MgO		bdl	0.01	0.01		bdl	0.01	0.02
CaO		18	17.8	17.35		17.77	17.73	17.74
Na2O		bdl	bdl	0.01		0.03	bdl	0.01
K2O		bdl	bdl	0.01		0.02	bdl	bdl
Total (Wt.%)		88.592	87.9	86.6		89.05	89.12	88.4
Cations calculated on 8 oxygen basis
Si		2	1.99	2.02		1.99	1.99	2
Ti		0	0	0		0	0	0
Al		1.93	1.94	1.91		1.95	1.95	1.94
Fe3+		0.08	0.08	0.08		0.08	0.08	0.08
Cr		0	0	0		0	0	0
Mn		0	0	0		0	0	0
Mg		0	0	0		0	0	0
Ca		1.02	1.02	1.01		1	1	1.01
Na		0	0	0		0	0	0
K		0	0	0		0	0	0
Total (cations)		5.03	5.03	5.02		5.02	5.02	5.03
Note: bdl = below detection level.

## Sheet: Metasediments (Trace)
REPRESENTATIVE TRACE ELEMENT COMPOSITIONS OF LAWSONITE IN METASEDIMENTS
Lithology		Quartzite
Sample #		SV10-06	SV10-06
Textural Position		core	rim
(ppm)
P		23.5	21.6
Sc		2.9	3.41
Ti		322	356
V		204.2	185.4
Cr		20.9	28.9
Mn		93.8	99.4
Sr		738	722
Y		112.9	118.5
Zr		bdl	bdl
Nb		bdl	bdl
Cs		0.023	0.006
Ba		0.022	0.034
La		220.1	289.7
Ce		537	633
Pr		57.1	63.2
Nd		227.6	236.7
Sm		45.7	45.4
Eu		10.08	9.82
Gd		42.3	38
Tb		5.93	5.79
Dy		30.5	30.8
Ho		4.21	4.19
Er		6.38	5.87
Tm		0.324	0.366
Yb		0.91	1.05
Lu		0.057	0.078
Hf		bdl	bdl
Ta		bdl	bdl
Pb		136.4	127
Th		17.63	27
U		2.57	2.01
Note: bdl = below detection limit.

## Sheet:  Lws + Chl (Majors)
REPRESENTATIVE MAJOR ELEMENT COMPOSITIONS OF LAWSONITE IN LAWSONITE + CHLORITE ROCKS
Lithology		Lawsonite + chlorite (Halilbağı)					Lawsonite + chlorite (Tavşanlı)				Lawsonite + chlorite + garnet (Halilbağı)
Sample #		SV12-21D	SV12-21D	SV12-21D	SV12-21D		TZ10-2.2c	TZ10-2.2c	TZ10-2.2c		SV13-17A	SV13-17A	SV13-17A	SV13-17A
Textural Position		Ti-rich	Ti-rich	Ti-poor	Ti-poor		Ti-rich		Ti-poor		Fe-poor core	Fe-rich rim	Ti-rich sector	Ti-poor sector
SiO2		37.8	37.84	38.13	37.79		38.39	38.49	37.87		38.62	38.19	38.24	38.53
TiO2		0.54	1.03	0.05	bdl		0.32	0.15	0.01		0.5	0.6	0.87	0.05
Al2O3		30.96	30.51	31.73	31.58		31.09	31.44	31.23		31.9	30.77	30.93	31.48
Cr2O3		0.04	0.05	0.04	0.05		bdl	0.05	0.03		0.16	0.15	0.16	0.22
FeO*		2.06	1.87	1.4	1.28		1.31	1.24	1.47		1.04	2.08	1.61	1.4
MnO		0.03	0.01	bdl	0.01		bdl	bdl	bdl		0.03	bdl	bdl	bdl
MgO		0.01	0.02	bdl	0.01		bdl	bdl	0.01		0.03	0.01	0.05	0.01
CaO		17.55	17.76	17.87	17.69		17.94	17.9	18.02		17.73	17.54	17.64	17.17
Na2O		0.01	0.01	0.03	0.04		0.01	0.01	0.03		bdl	0.02	0.01	bdl
K2O		bdl	bdl	bdl	bdl		bdl	bdl	bdl		bdl	0.01	bdl	bdl
Total (Wt.%)		89	89.1	89.25	88.45		89.06	89.28	88.67		90.01	89.37	89.51	88.86
Cations calculated on 8 oxygen basis
Si		1.99	1.99	2	1.99		2.01	2.01	1.99		2	2	1.99	2.02
Ti		0.02	0.04	0	0		0.01	0.01	0		0.02	0.02	0.03	0
Al		1.92	1.89	1.96	1.96		1.92	1.94	1.94		1.95	1.9	1.91	1.95
Fe3+		0.09	0.08	0.06	0.06		0.06	0.05	0.07		0.05	0.09	0.07	0.06
Cr		0	0	0	0		0	0	0		0.01	0.01	0.01	0.01
Mn		0	0	0	0		0	0	0		0	0	0	0
Mg		0	0	0	0		0	0	0		0	0	0	0
Ca		0.99	1	1	1		1.01	1	1.02		0.98	0.99	0.99	0.96
Na		0	0	0	0		0	0	0		0	0	0	0
K		0	0	0	0		0	0	0		0	0	0	0
Total (cations)		5.01	5	5.02	5.01		5.01	5.01	5.02		5.01	5.01	5	5
Note: bdl = below detection level.

## Sheet:  Lws + Chl (Trace)
REPRESENTATIVE TRACE ELEMENT COMPOSITIONS OF LAWSONITE IN LAWSONITE + CHLORITE ROCKS
Lithology		Lawsonite + chlorite (Halilbağı)					Lawsonite + chlorite (Tavşanlı)					Lawsonite + chlorite + garnet (Halilbağı)
Sample #		SV12-21d	SV12-21d	SV12-21d	SV12-21d		TZ10-2.2c	TZ10-2.2c	TZ10-2.2c	TZ10-2.2c		SV13-17A	SV13-17A	SV13-17A	SV13-17A
Textural Position		high Ti	high Ti	low Ti	low Ti		high Ti	high Ti	low Ti	low Ti		Fe-poor core	Fe-rich rim	Ti-rich sector	Ti-poor sector
(ppm)
P		36	27	61	85		15.5	24.7	14.9	20.8		21	8	24	1
Sc		4.89	3.54	2.32	2.71		26.07	27.1	19.68	18.97		46.3	23.1	26.4	11.9
Ti		5160	6470	265	277		1922	1716	292	171.9		2980	2640	2000	249
V		247.9	241	222.5	243.2		1424	1448	1023	1551		898	695	709	900
Cr		629.3	584	534	555		106.8	99.9	50	68.2		1349	637	1110	860
Mn		24.1	20.8	20.7	31.7		19.19	20.29	14.96	15.45		77.7	30.7	42	36
Sr		505	485	755	815		1212	1177	1035	1585		2294	1015	604	1380
Y		8.02	6.16	32.1	32.6		45.5	23.2	25.03	63.2		161	162.9	310	190
Zr		0	0.034	0	0.073		0.166	0.013	bdl	bdl		0	0.43	24	0.12
Nb		0.074	0	0	0.051		0.0103	bdl	bdl	0.014		0	0	0	0
Cs		0.23	0	0	0.28		0.01	bdl	bdl	0.036		0.95	0	0	0.28
Ba		3.2	0.58	0.74	5.2		0.035	2.15	bdl	1.18		2.1	0.9	5.4	4
La		1.26	0.374	2.19	1.73		3.78	3.02	3.56	9.88		2.84	2.8	12.7	4.9
Ce		2.26	0.87	4.12	3.14		9.92	7.43	10.78	27.8		6.6	7.84	35.2	14.2
Pr		0.4	0.157	0.8	0.678		1.571	1.14	1.75	4.08		1.5	1.58	5.75	2.34
Nd		2.37	0.83	4.24	2.97		9.02	6.53	8.65	20.66		12.9	9	40.7	14.8
Sm		0.5	0.27	1.39	1.22		3.91	2.07	2.88	7.28		5.7	4.73	14.5	5.3
Eu		0.274	0.214	0.66	0.52		1.78	0.93	1.028	3.01		4.18	2.56	8	4.8
Gd		0.56	0.87	3.23	1.94		7.03	3.56	3.75	11.72		12.1	11.7	32.7	14.5
Tb		0.149	0.144	0.54	0.316		1.081	0.542	0.602	1.582		3.21	2.62	5.8	3.5
Dy		1.08	1.11	4.72	4.51		7.23	3.83	4.19	10.77		23	19.7	47	29.2
Ho		0.17	0.231	1.22	1.17		1.6	0.761	0.885	2.07		6.1	5.19	10.1	6.7
Er		0.72	0.75	4.88	5.18		4.24	2.03	2.42	5.37		11.8	13	23.3	20.1
Tm		0.101	0.057	0.81	1.01		0.457	0.197	0.236	0.487		1.83	1.59	2.41	2.6
Yb		0.74	0.59	6.16	8.49		2.55	1.29	1.57	2.95		9.2	9.4	13.6	13.9
Lu		0.059	0.069	1.22	1.76		0.394	0.244	0.182	0.478		1.26	1.45	1.52	2.73
Hf		0	0	0	0		0.016	bdl	0.00292	0.00161		0.049	0	0.97	0
Ta		0	0	0	0		0.0012	bdl	bdl	bdl		0	0	0	0
Pb		18.7	18.1	22.22	26.84		27.84	28.69	25.16	32.91		71.1	38.8	25.8	47
Th		0.012	0	0	0		0.63	0.97	0.359	4.1		0.067	0.26	2.3	0.07
U		0.0059	0	0	0.019		0.14	0.157	0.033	0.263		0.74	0.069	1.14	0.13
Note: bdl = below detection level.

## Sheet:  Lws Layers (Majors)
REPRESENTATIVE MAJOR ELEMENT COMPOSITIONS OF LAWSONITE IN LAWSONITE-RICH LAYERS AND VEINS
Lithology		Lawsonite layer (margin)			Lawsonite layer (interior)			Lws vein
Sample #		SV03-103C	SV03-103C		SV03-103C	SV03-103C		SV12-24B
Textural Position		Fe-poor core	Fe-rich rim		Fe-poor core	Fe-rich rim		Bulk*
SiO2		38.36	38.31		38.36	38.54		38
TiO2		0.48	0.41		0.03	0.38		0.13
Al2O3		32.18	31.97		32.67	31.7		27.92
Cr2O3		0.01	0.08		0	0		2.69
FeO*		0.67	1.45		0.65	1.45		0.01
MnO		bdl	bdl		bdl	bdl		0.05
MgO		bdl	bdl		bdl	bdl		18.93
CaO		17.91	17.67		18	17.83		0.05
Na2O		bdl	bdl		bdl	bdl		0.07
K2O		bdl	bdl		bdl	bdl		0.01
Total (Wt.%)		89.61	89.89		89.71	89.9		87.86
Cations calculated on 8 oxygen basis
Si		1.99	1.99		1.99	2
Ti		0.02	0.02		0	0.01
Al		1.97	1.96		1.99	1.94
Fe3+		0.03	0.06		0.03	0.06
Cr		0	0		0	0
Mn		0	0		0	0
Mg		0	0		0	0
Ca		1	0.98		1	0.99
Na		0	0		0	0
K		0	0		0	0
Total (cations)		5.01	5.01		5.01	5
Note: bdl, below detection level
*Data obtained from an ICP-OES bulk rock analysis of a mono-minerallic lawsonite vein.

## Sheet: Lws Layers (Trace)
REPRESENTATIVE TRACE ELEMENT COMPOSITIONS OF LAWSONITE IN LAWSONITE-RICH LAYERS AND VEINS
Lithology		Lawsonite + garnet + phengite layer					Lws vein
Sample #		SV03-103C	SV03-103C	SV03-103C	SV03-103C		SV12-24B
Textural Position		Fe-poor core	Fe-rich rim	Ti-poor sector	Ti-rich sector		Bulk
(ppm)
P		34	28.5	17	30.4		na*
Sc		2.6	2.74	2.29	2.55		na
Ti		883	2368	200	3060		na
V		38.8	47.9	42.9	45.8		189
Cr		17.6	4.01	5.3	14.58		bdl
Mn		6.3	20.9	22.2	26.8		na
Sr		877	541.1	1137	626		740
Y		40.6	7.1	19.8	36.4		90.8
Zr		158	0.02	3.2	0		6
Nb		0.12	0.005	0	0.44		0.8
Cs		0.07	0.1	0	0		bdl
Ba		0	0	0.26	0.26		15
La		7.76	9.7	35.8	18.6		86.2
Ce		19.25	21.7	93.7	51.3		172
Pr		2.52	2.62	12.25	6.9		19.4
Nd		13	11.54	57.1	35.6		79.2
Sm		3.63	3.32	16.7	11.52		16.5
Eu		0.92	0.86	2.97	3.06		5.08
Gd		5.6	3.13	14.8	13.8		16.8
Tb		0.91	0.373	1.74	2.07		2.55
Dy		7.94	2.03	7.38	11.26		14.6
Ho		1.59	0.257	1.02	1.58		2.81
Er		3.88	0.51	1.66	3.1		7.69
Tm		0.32	0.055	0.183	0.315		0.914
Yb		1.27	0.47	1.17	1.58		4.63
Lu		0.273	0.025	0.113	0.158		0.66
Hf		3.9	0	0.12	0		0.2
Ta		0.051	0.0048	0	0.0097		2.88
Pb		22.2	10.97	34.4	17.65		59
Th		1.23	0.301	0.97	0.573		1.33
U		0.61	0.9	0.08	0.225		2.28
Note: bdl = below detection limits
*na = not analyzed.
