# Supplementary material
Source: publisher figshare collection journal article supplement (https://gsapubs.figshare.com/ndownloader/files/22411437)

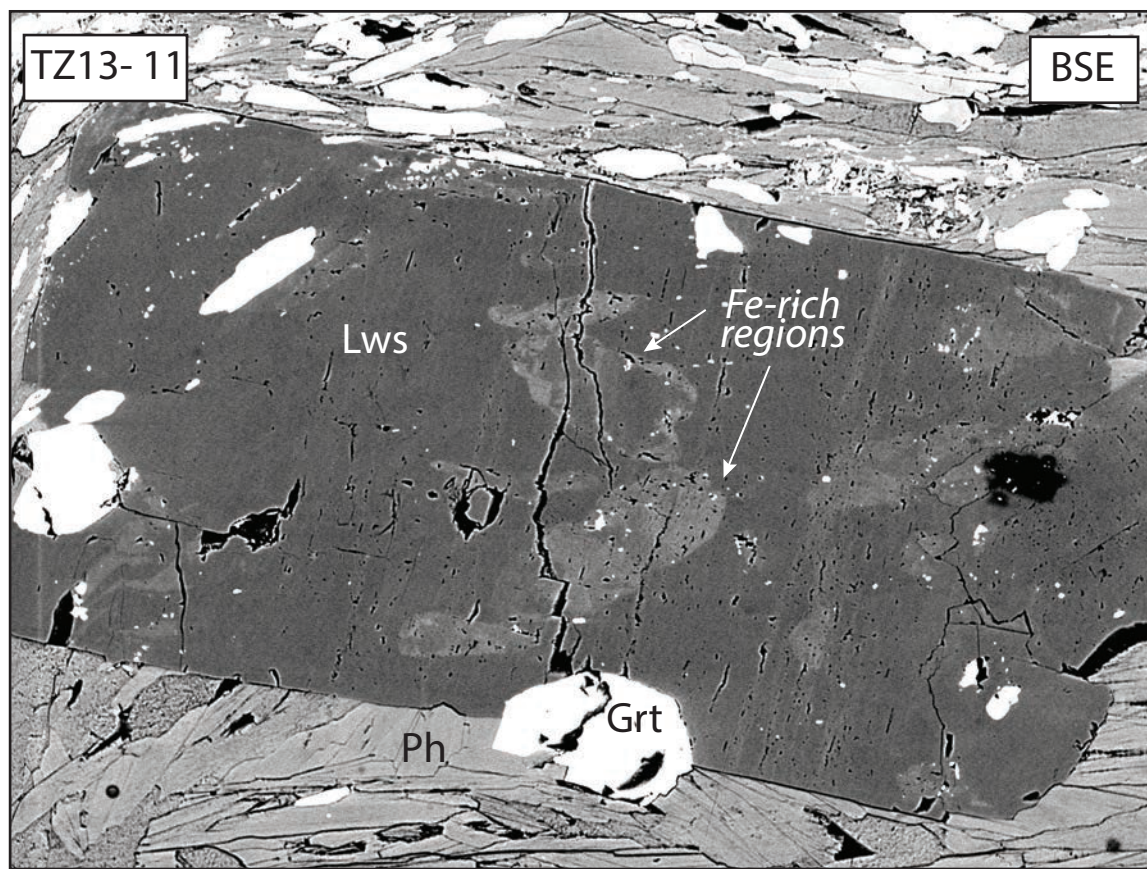

Supplementary Figure S2, Fornash et al.

Supplement: Supplementary file 1 [file 22411437 › GES01455_SuppMat/Figure S2.pdf]
